# Supplementary material for: Humic acid regulation of the environmental behavior and phytotoxicity of silver nanoparticles to Lemna minor
Source: Royal Society of Chemistry journal article supplement (doi:10.1039/c9en00980a), 2019-01-01
Supplement: c9en00980a1.pdf [file c9en00980a1.pdf]

**Table S1.** Formulation of the 25%-strength Hoagland solution used in the study

| Macronutrient (M)                                    |       | Micronutrient (M)                                                    |         |
|------------------------------------------------------|-------|----------------------------------------------------------------------|---------|
| Ca(NO <sub>3</sub> ) <sub>2</sub> ·4H <sub>2</sub> O | 1     | H <sub>3</sub> BO <sub>3</sub>                                       | 0.03    |
| MgSO <sub>4</sub> ·7H <sub>2</sub> O                 | 1     | (NH <sub>4</sub> ) <sub>2</sub> ·MoO <sub>4</sub> ·4H <sub>2</sub> O | 0.01    |
| KNO <sub>3</sub>                                     | 1     | ZnSO <sub>4</sub> ·7H <sub>2</sub> O                                 | 0.004   |
| NH <sub>4</sub> H <sub>2</sub> PO <sub>4</sub>       | 1     | MnCl·4H <sub>2</sub> O                                               | 0.005   |
| FeNa·EDTA                                            | 0.2   | HCl                                                                  | 2       |
| CuSO <sub>4</sub> ·5H <sub>2</sub> O                 | 0.002 |                                                                      |         |
|                                                      |       | pH (with KOH)                                                        | 5.5-5.7 |
